# Supplementary material for: Three guest-dependent nitrate–water aggregations encapsulated in silver(i)–bipyridine supramolecular frameworks
Source: Royal Society of Chemistry journal article supplement (doi:10.1039/c2ce26161h), 2012-01-01

## Electronic Supplementary Information (ESI) for *CrystEngComm*

### Guest-dependent three nitrate–water aggregations encapsulated in silver(I)-bipyridine supramolecular frameworks

Di Sun,<sup>\*a</sup> Fu-Jing Liu,<sup>b</sup> Rong-Bin Huang,<sup>b</sup> Lan-Sun Zheng<sup>b</sup>

<sup>a</sup>Key Lab of Colloid and Interface Chemistry, Ministry of Education, School of Chemistry and Chemical Engineering, Shandong University, Jinan, Shandong, 250100, China.

E-mail: dsun@sdu.edu.cn

<sup>b</sup>State Key Laboratory of Physical Chemistry of Solid Surface, Department of Chemistry, College of Chemistry and Chemical Engineering, Xiamen University, Xiamen, 361005, China

### Content

|                                                                                                                             |   |
|-----------------------------------------------------------------------------------------------------------------------------|---|
| (1) Experiment details.....                                                                                                 | 2 |
| (2) Synthesis of 1 - 3 .....                                                                                                | 3 |
| (3) X-ray Crystallography .....                                                                                             | 4 |
| (4) Table S1: Crystal data for 1-3.....                                                                                     | 5 |
| (5) Table S2 The C-H··· $\pi$ interactions in 1-3 .....                                                                     | 6 |
| (6) Fig. S1: IR of 1-3.....                                                                                                 | 7 |
| (7) Fig. S2: The powder XRD patterns and the simulated one from the single-crystal diffraction data for complexes 1-3 ..... | 8 |

Electronic Supplementary Information (ESI) for *CrystEngComm*

**(1) Experiment details**

Materials and General Methods.

All the reagents and solvents employed were commercially available and used as received without further purification. Infrared spectra were recorded on a Nicolet AVATAT FT-IR330 spectrometer as KBr pellets in the frequency range 4000-400  $\text{cm}^{-1}$ . The elemental analyses (C, H, N contents) were determined on a CE instruments EA 1110 analyzer. Photoluminescence measurements were performed on a Hitachi F-7000 fluorescence spectrophotometer with solid powder on a 1 cm quartz round plate. Thermogravimetric (TG) curves were measured from 30 to 750 °C on a NETZSCH TG 209 F1 Iris® Thermogravimetric Analyser at the heating rate 10 °C/min under N<sub>2</sub> atmosphere (20 mL/min).

## (2) Synthesis of **1** - **3**

### Synthesis of $[\text{Ag}_4(\text{bipy})_4 \cdot o\text{-abn} \cdot 4\text{NO}_3 \cdot 6\text{H}_2\text{O}]_n$ (**1**)

Reaction of a mixture of  $\text{AgNO}_3$  (17 mg, 0.1 mmol),  $\text{bipy} \cdot 2\text{H}_2\text{O}$  (19.4 mg, 0.1 mmol) and *o*-abn (12 mg, 0.1 mmol) in methanol- $\text{H}_2\text{O}$  (6 mL, *v:v* = 1:2) under the ultrasonic condition (160W, 40 KHz, 40 min, room temperature). Then aqueous  $\text{NH}_3$  solution (25%, 0.5 mL) was dropped into the mixture to give a clear solution. The resultant solution was allowed to evaporate slowly in darkness at room temperature for several days to give pale-yellow crystals of **1** (Yield: 51%, based on silver). Anal. Calc. (found) for  $\text{C}_{47}\text{H}_{50}\text{Ag}_4\text{N}_{14}\text{O}_{18}$ : C, 36.88 (36.69); H, 3.29 (3.58); N, 12.81 (12.30) %. IR (KBr):  $\nu(\text{cm}^{-1})$  = 3412 (s), 2201 (m), 1652 (m), 1600 (s), 1486 (m), 1382 (s), 1225 (m), 807 (m).

### Synthesis of $[\text{Ag}_3(\text{bipy})_3 \cdot m\text{-abn} \cdot 3\text{NO}_3 \cdot 2\text{H}_2\text{O}]_n$ (**2**):

Synthesis of **2** is the similar to that of **1**, but using *m*-abn (12 mg, 0.1 mmol) instead of *o*-abn. The crystals were isolated by filtration and dried in air. (Yield: 71%, based on silver). Anal. Calc. (found) for  $\text{C}_{37}\text{H}_{34}\text{Ag}_3\text{N}_{11}\text{O}_{11}$ : C, 39.25 (40.09); H, 3.03 (2.88); N, 13.61 (13.30) %. IR (KBr):  $\nu(\text{cm}^{-1})$  = 3446 (s), 2226 (m), 1599 (s), 1390 (s), 1216 (m), 815 (w).

### Synthesis of $[\text{Ag}_2(\text{bipy})_2 \cdot p\text{-abn} \cdot 2\text{NO}_3 \cdot \text{H}_2\text{O}]_n$ (**3**)

Synthesis of **3** is the similar to that of **1**, but using *p*-abn (12 mg, 0.1 mmol) instead of *o*-abn. The crystals were isolated by filtration and dried in air. (Yield: 65 %, based on silver). Anal. Calc. (found) for  $\text{C}_{27}\text{H}_{24}\text{Ag}_2\text{N}_8\text{O}_7$ : C, 41.14 (41.00); H, 3.07 (3.28); N, 14.22 (14.54) %. IR (KBr):  $\nu(\text{cm}^{-1})$  = 3441 (s), 2205 (s), 1599 (s), 1384 (s), 1225 (m), 1161 (w), 1069 (w), 801 (w).

### (3) X-ray Crystallography

Single crystals of the complexes **1-3** with appropriate dimensions were chosen under an optical microscope and quickly coated with high vacuum grease (Dow Corning Corporation) before being mounted on a glass fiber for data collection. Data were collected on a Rigaku R–AXIS RAPID Image Plate single–crystal diffractometer (Mo K $\alpha$  radiation,  $\lambda = 0.71073$  Å) equipped with an Oxford Cryostream low-temperature apparatus operating at 50 kV and 90 mA in  $\omega$  scan mode for **1-3**. A total of  $44 \times 5.00^\circ$  oscillation images was collected, each being exposed for 5.0 min. Absorption correction was applied by correction of symmetry–equivalent reflections using the ABSCOR program.<sup>1</sup> In all cases, the highest possible space group was chosen. All structures were solved by direct methods using SHELXS–97<sup>2</sup> and refined on  $F^2$  by full-matrix least-squares procedures with SHELXL–97.<sup>3</sup> Atoms were located from iterative examination of difference  $F$ -maps following least squares refinements of the earlier models. Hydrogen atoms were placed in calculated positions and included as riding atoms with isotropic displacement parameters 1.2 – 1.5 times  $U_{eq}$  of the attached C atoms. The hydrogen atoms attached to oxygen were refined with O–H = 0.85 Å, and  $U_{iso}(H) = 1.2U_{eq}(O)$ . All structures were examined using the Addsym subroutine of PLATON<sup>4</sup> to assure that no additional symmetry could be applied to the models. In **1**, The highest peaks 1.29 and the deepest hole -1.10 locate close to Ag with distances of 0.98 and 1.38 Å, respectively. In **3**, The highest peaks 1.42 and the deepest hole -0.90 locate close to Ag with distances of 0.88 and 0.76 Å, respectively. These could be ascribed to the ghosts of the heavy atom (Fourier truncation errors).

- (1) Higashi, T. *ABSCOR, Empirical Absorption Correction based on Fourier Series Approximation*, Rigaku Corporation, Tokyo, 1995.
- (2) Sheldrick, G. M. *SHELXS-97, Program for X-ray Crystal Structure Determination*, University of Gottingen, Germany, 1997.
- (3) Sheldrick, G. M. *SHELXL-97, Program for X-ray Crystal Structure Refinement*, University of Gottingen, Germany, 1997.
- (4) Spek, A. L. *Implemented as the PLATON Procedure, a Multipurpose Crystallographic Tool*, Utrecht University, Utrecht, The Netherlands, 1998.

Electronic Supplementary Information (ESI) for *CrystEngComm*

**(4) Table S1: Crystal data for 1-3**

|                                                              |                                                                                     |                                                                                     |                                                                                   |
|--------------------------------------------------------------|-------------------------------------------------------------------------------------|-------------------------------------------------------------------------------------|-----------------------------------------------------------------------------------|
| Empirical formula                                            | C <sub>47</sub> H <sub>50</sub> Ag <sub>4</sub> N <sub>14</sub> O <sub>18</sub> (1) | C <sub>37</sub> H <sub>34</sub> Ag <sub>3</sub> N <sub>11</sub> O <sub>11</sub> (2) | C <sub>27</sub> H <sub>24</sub> Ag <sub>2</sub> N <sub>8</sub> O <sub>7</sub> (3) |
| Formula weight                                               | 1530.49                                                                             | 1132.36                                                                             | 788.28                                                                            |
| Temperature/K                                                | 173(2)                                                                              | 293(2)                                                                              | 173(2)                                                                            |
| Crystal system                                               | triclinic                                                                           | monoclinic                                                                          | monoclinic                                                                        |
| Space group                                                  | <i>P</i> -1                                                                         | <i>Cc</i>                                                                           | <i>P</i> 2 <sub>1</sub> / <i>c</i>                                                |
| <i>a</i> /Å                                                  | 11.328(2)                                                                           | 19.314(4)                                                                           | 14.010(4)                                                                         |
| <i>b</i> /Å                                                  | 13.975(3)                                                                           | 12.146(2)                                                                           | 11.380(3)                                                                         |
| <i>c</i> /Å                                                  | 18.270(3)                                                                           | 17.814(4)                                                                           | 18.085(5)                                                                         |
| $\alpha$ /°                                                  | 106.019(4)                                                                          | 90.00                                                                               | 90.00                                                                             |
| $\beta$ /°                                                   | 100.171(4)                                                                          | 106.86(3)                                                                           | 101.627(5)                                                                        |
| $\gamma$ /°                                                  | 102.572(3)                                                                          | 90.00                                                                               | 90.00                                                                             |
| Volume/Å <sup>3</sup>                                        | 2625.6(9)                                                                           | 3999.4(14)                                                                          | 2824.2(13)                                                                        |
| <i>Z</i>                                                     | 2                                                                                   | 4                                                                                   | 4                                                                                 |
| $\rho_{\text{calc}}$ /mg/mm <sup>3</sup>                     | 1.936                                                                               | 1.881                                                                               | 1.854                                                                             |
| $\mu$ /mm <sup>-1</sup>                                      | 1.559                                                                               | 1.530                                                                               | 1.449                                                                             |
| <i>F</i> (000)                                               | 1524.0                                                                              | 2248.0                                                                              | 1568.0                                                                            |
| Crystal size/mm <sup>3</sup>                                 | 0.40 × 0.40 × 0.20                                                                  | 0.10 × 0.10 × 0.08                                                                  | 0.40 × 0.40 × 0.20                                                                |
| 2 $\theta$ range for data collection                         | 2.4 to 50°                                                                          | 6.7 to 49.98°                                                                       | 2.96 to 50°                                                                       |
| Index ranges                                                 | -13 ≤ <i>h</i> ≤ 13, -16 ≤ <i>k</i> ≤ 13, -20 ≤ <i>l</i> ≤ 22                       | -14 ≤ <i>k</i> ≤ 14, -21 ≤ <i>l</i> ≤ 16                                            | -16 ≤ <i>h</i> ≤ 15, -13 ≤ <i>k</i> ≤ 8, -21 ≤ <i>l</i> ≤ 20                      |
| Reflections collected                                        | 13452                                                                               | 15101                                                                               | 13681                                                                             |
| Independent reflections                                      | 9130[R(int) = 0.0315]                                                               | 6519[R(int) = 0.0381]                                                               | 4950[R(int) = 0.0606]                                                             |
| Data/restraints/parameters                                   | 9130/6/757                                                                          | 6519/2/559                                                                          | 4950/30/397                                                                       |
| Goodness-of-fit on <i>F</i> <sup>2</sup>                     | 1.169                                                                               | 1.013                                                                               | 1.189                                                                             |
| Final <i>R</i> indexes [ <i>I</i> ≥ 2 $\sigma$ ( <i>I</i> )] | <i>R</i> <sub>1</sub> = 0.0661, <i>wR</i> <sub>2</sub> = 0.1228                     | <i>R</i> <sub>1</sub> = 0.0306, <i>wR</i> <sub>2</sub> = 0.0657                     | <i>R</i> <sub>1</sub> = 0.0767, <i>wR</i> <sub>2</sub> = 0.1979                   |
| Final <i>R</i> indexes [all data]                            | <i>R</i> <sub>1</sub> = 0.0828, <i>wR</i> <sub>2</sub> = 0.1308                     | <i>R</i> <sub>1</sub> = 0.0344, <i>wR</i> <sub>2</sub> = 0.0688                     | <i>R</i> <sub>1</sub> = 0.0994, <i>wR</i> <sub>2</sub> = 0.2106                   |
| Largest diff. peak/hole / e Å <sup>-3</sup>                  | 1.29/-1.10                                                                          | 0.37/-0.55                                                                          | 1.60/-1.00                                                                        |
| Flack parameter                                              | N/A                                                                                 | 0.01(2)                                                                             | N/A                                                                               |

Electronic Supplementary Information (ESI) for *CrystEngComm*

**(5) Table S2 The C-H... $\pi$  interactions in 1-3**

| Compound 1                                                                                |           |           |           |
|-------------------------------------------------------------------------------------------|-----------|-----------|-----------|
| C-H...Cg                                                                                  | H...Cg(Å) | C...Cg(Å) | H...Cg(Å) |
| C7-H7...Cg1                                                                               | 2.79      | 3.630(8)  | 148       |
| C37-H37...Cg1                                                                             | 2.65      | 3.516(7)  | 151       |
| Cg1: C41/C42/C43/C44/C45/C46                                                              |           |           |           |
| Compound 2                                                                                |           |           |           |
| C2-H2...Cg1A                                                                              | 2.96      | 3.846(6)  | 160       |
| C14-H14...Cg1B                                                                            | 2.86      | 3.735(6)  | 158       |
| Cg1: C31/C32/C33/C34/C35/C36. Symmetry code: (A) x, 1-y, 1/2+z. (B) -1/2+x, 3/2-y, -1/2+z |           |           |           |
| Compound 3                                                                                |           |           |           |
| C4-H4...Cg1C                                                                              | 2.63      | 3.460(10) | 146       |
| Cg1: C22/C23/C24/C25/C26/C27. Symmetry code: (C) 1-x, 1-y, 1-z.                           |           |           |           |

(6) Fig. S1: IR of 1-3

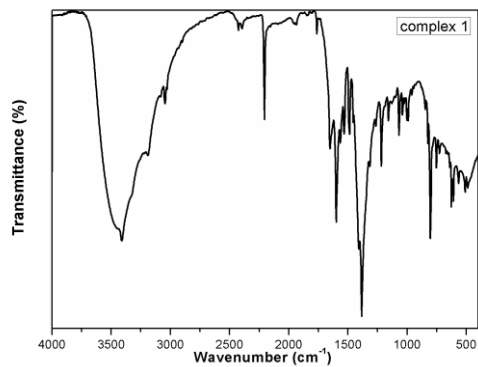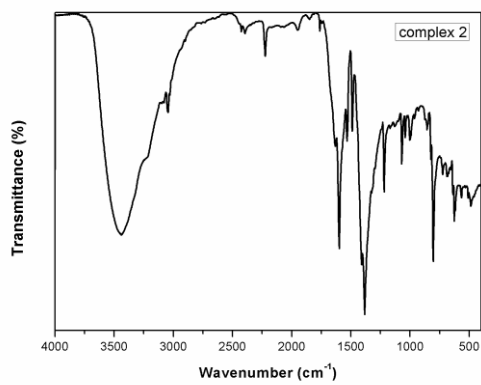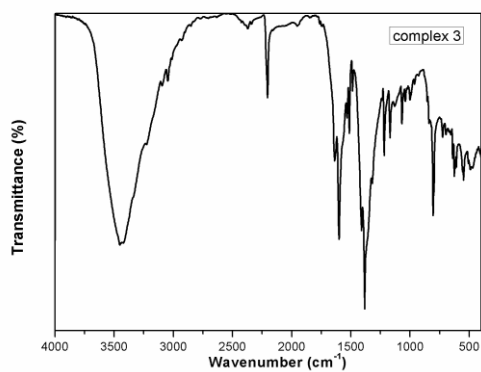

**(7) Fig. S2: The powder XRD patterns and the simulated one from the single-crystal diffraction data for complexes 1-3**

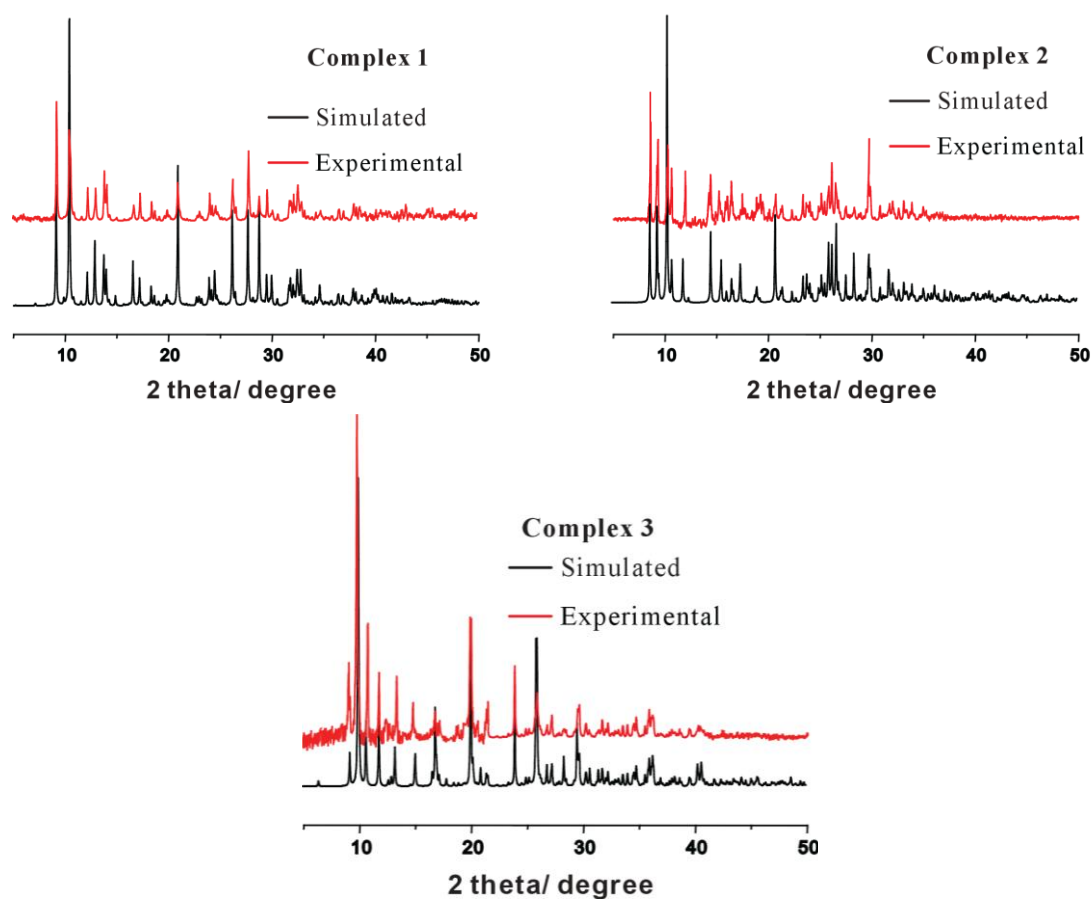

Supplement: c2ce26161h.pdf [file c2ce26161h.pdf]
